# Supplementary material for: Novel near-IR absorbing phenyl-substituted phthalo- and naphthalocyanine complexes of lanthanide(iii): synthesis and spectral and electrochemical properties
Source: Royal Society of Chemistry journal article supplement (doi:10.1039/c3dt52726c), 2013-11-26
Supplement: c3dt52726c.pdf [file c3dt52726c.pdf]

**Supporting Information**

**Novel Near-IR Absorbing Phenyl-Substituted Phthalo- and Naphthalocyanine Complexes of Lanthanide (III): Synthesis, Spectral and Electrochemical Properties**

Tatiana V. Dubinina,<sup>\*a,b</sup> Kseniya V. Paramonova,<sup>a</sup> Stanislav A. Trashin,<sup>b</sup> Nataliya E. Borisova,<sup>a</sup> Larisa G. Tomilova,<sup>a,b</sup> and Nikolay S. Zefirov<sup>a,b</sup>

*[a] Chemistry Department, M.V. Lomonosov Moscow State University, 1 Leninskie Gory, 119991 Moscow, Russian Federation*  
*Fax: +7 (495) 939 0290*  
*E-mail: [dubinina.t.vid@gmail.com](mailto:dubinina.t.vid@gmail.com)*

*[b] Institute of Physiologically Active Compounds, Russian Academy of Sciences, 1 Severny proezd, 142432 Chernogolovka, Moscow Region, Russian Federation*  
*Fax: +7-496-524-9508*  
*E-mail: [tom@org.chem.msu.ru](mailto:tom@org.chem.msu.ru)*

## Contents list

Table S1. High-resolution mass spectrometry MALDI TOF/TOF data.

Table S2. Spectral and electrochemical data for substituted diphthalocyanine lutetium complexes in *o*-DCB.

Table S3. Crystal data and structure refinement for diphthalocyanine **5c**.

Figure S1. UV-Vis spectra of diphthalocyanines **5b** (<sup>Ph</sup>Pc<sub>2</sub>Er), octa-butyl substituted diphthalocyanine erbium (<sup>Bu</sup>Pc<sub>2</sub>Er) and octa-ethyl substituted diphthalocyanine erbium (<sup>Et</sup>Pc<sub>2</sub>Er) in CHCl<sub>3</sub>.

Figure S2. Near-IR spectra of dinaphthalocyanines **11a-c** in CCl<sub>4</sub>.

Figure S3. UV/Vis spectra of triple-decker **6a-c** complexes in THF.

Figure S4-S12. High-resolution MALDI-TOF/TOF mass spectra.

Figure S13. Disposition of residual peaks (before SQUEEZE procedure) in the structure of **5c**: fragment of packing (view along crystallographic axis b, left) and residual peaks view perpendicular to the q4-q30 plane.

Figure S14. TGA (solid line) and DTG (dashed line) curves for complex **5c**.

Table S1. High-resolution mass spectrometry MALDI TOF/TOF data.

| Compound<br>(Molecular<br>formula)                                                | Mass found | Monoisotopic mass<br>calculated |
|-----------------------------------------------------------------------------------|------------|---------------------------------|
| <b>5a</b><br>(C <sub>160</sub> H <sub>97</sub> EuN <sub>16</sub> )                | 2394.8547  | 2394.7294                       |
| <b>5b</b><br>(C <sub>160</sub> H <sub>100</sub> ErN <sub>16</sub> )               | 2410.7451  | 2410.7620                       |
| <b>5c</b><br>(C <sub>160</sub> H <sub>98</sub> LuN <sub>16</sub> )                | 2417.7568  | 2417.7915                       |
| <b>6a</b><br>(C <sub>240</sub> H <sub>145</sub> Eu <sub>2</sub> N <sub>24</sub> ) | 3668.9224  | 3668.0509                       |
| <b>6b</b><br>(C <sub>240</sub> H <sub>150</sub> Er <sub>2</sub> N <sub>24</sub> ) | 3699.8464  | 3699.1081                       |
| <b>6c</b><br>(C <sub>240</sub> H <sub>146</sub> Lu <sub>2</sub> N <sub>24</sub> ) | 3712.9421  | 3713.0978                       |
| <b>11a</b><br>(C <sub>192</sub> H <sub>114</sub> EuN <sub>16</sub> )              | 2795.4863  | 2795.8625                       |
| <b>11b</b><br>(C <sub>192</sub> H <sub>116</sub> ErN <sub>16</sub> )              | 2810.3835  | 2810.8872                       |
| <b>11c</b><br>(C <sub>192</sub> H <sub>115</sub> LuN <sub>16</sub> )              | 2818.3562  | 2818.8898                       |

Table S2. Spectral and electrochemical data for substituted diphthalocyanine lutetium complexes in *o*-DCB.

|                                                                                    | $\Delta E^{\circ}(\text{Ox}_2)-(\text{Ox}_1)$ | $\Delta E^{\circ}(\text{Red}_1)-(\text{Red}_2)$ | IV band/nm (CCl <sub>4</sub> ) |
|------------------------------------------------------------------------------------|-----------------------------------------------|-------------------------------------------------|--------------------------------|
| <i>o</i> -C <sub>5</sub> H <sub>11</sub> O <b>Pc<sub>2</sub>Lu</b> <sup>[21]</sup> | 0.95                                          | 1.20                                            | 1666                           |
| <b>BuPc<sub>2</sub>Lu</b> <sup>[22]</sup>                                          | 1.20                                          | 1.09                                            | 1453                           |
| <b>EtPc<sub>2</sub>Lu</b> <sup>[22]</sup>                                          | 1.20                                          | 1.09                                            | 1445                           |
| <b>PhPc<sub>2</sub>Lu (5c)</b>                                                     | 1.23                                          | 1.02                                            | 1393                           |

Table S3. Crystal data and structure refinement for diphthalocyanine **5c**.

|                                                 |                                             |
|-------------------------------------------------|---------------------------------------------|
| Empirical formula                               | C260 H497 Lu N16 O100.50                    |
| Formula weight [g mol <sup>-1</sup> ]           | 5630.68                                     |
| Temperature [K]                                 | 100(2)                                      |
| Wavelength [Å]                                  | 0.71073                                     |
| Crystal system                                  | Tetragonal                                  |
| Space group                                     | P 4/n                                       |
| a [Å]                                           | 31.3930(10)                                 |
| b [Å]                                           | 31.3930(10)                                 |
| c [Å]                                           | 10.6224(7)                                  |
| α [°]                                           | 90                                          |
| β [°]                                           | 90                                          |
| γ [°]                                           | 90                                          |
| Volume [Å] <sup>3</sup>                         | 10468.6(8)                                  |
| Z                                               | 2                                           |
| Density (calculated) [Mg/m <sup>3</sup> ]       | 0.770                                       |
| Absorption coefficient [μ, mm <sup>-1</sup> ]   | 0.509                                       |
| F(000)                                          | 2488                                        |
| Crystal size [mm <sup>3</sup> ]                 | 0.550 x 0.430 x 0.150                       |
| Theta range for data collection [°]             | 3.29 to 29.00                               |
| Index ranges                                    | -42≤h≤42, -42≤k≤42, -14≤l≤14                |
| Reflections collected                           | 122224                                      |
| Independent reflections                         | 13811 [R(int) = 0.0897]                     |
| Completeness to theta = 29.00°                  | 99.2 %                                      |
| Absorption correction                           | Semi-empirical from equivalents             |
| Max. and min. transmission                      | 0.916 and 0.761                             |
| Refinement method                               | Full-matrix least-squares on F <sup>2</sup> |
| Data / restraints / parameters                  | 13811 / 0 / 402                             |
| Goodness-of-fit on F <sup>2</sup>               | 0.998                                       |
| Final R indices [I>2sigma(I)]                   | R1 = 0.0484, wR2 = 0.1145                   |
| R indices (all data)                            | R1 = 0.0689, wR2 = 0.1222                   |
| Largest diff. peak and hole [e/Å] <sup>-3</sup> | 3.580 and -1.415                            |

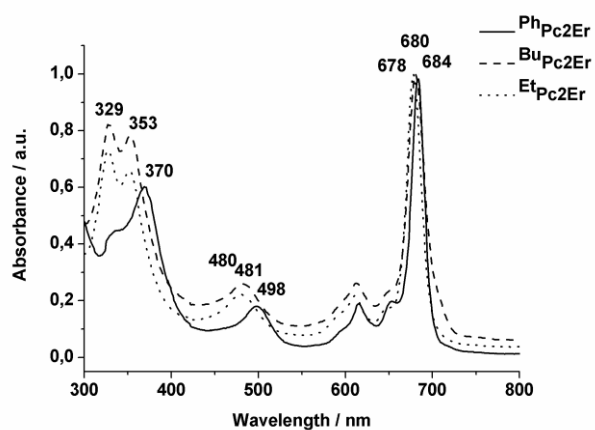

Figure S1. UV-Vis spectra of diphthalocyanines **5b** ( $^{\text{Ph}}\text{Pc}_2\text{Er}$ ), octa-butyl substituted diphthalocyanine erbium ( $^{\text{Bu}}\text{Pc}_2\text{Er}$ ) and octa-ethyl substituted diphthalocyanine erbium ( $^{\text{Et}}\text{Pc}_2\text{Er}$ ) in  $\text{CHCl}_3$ .

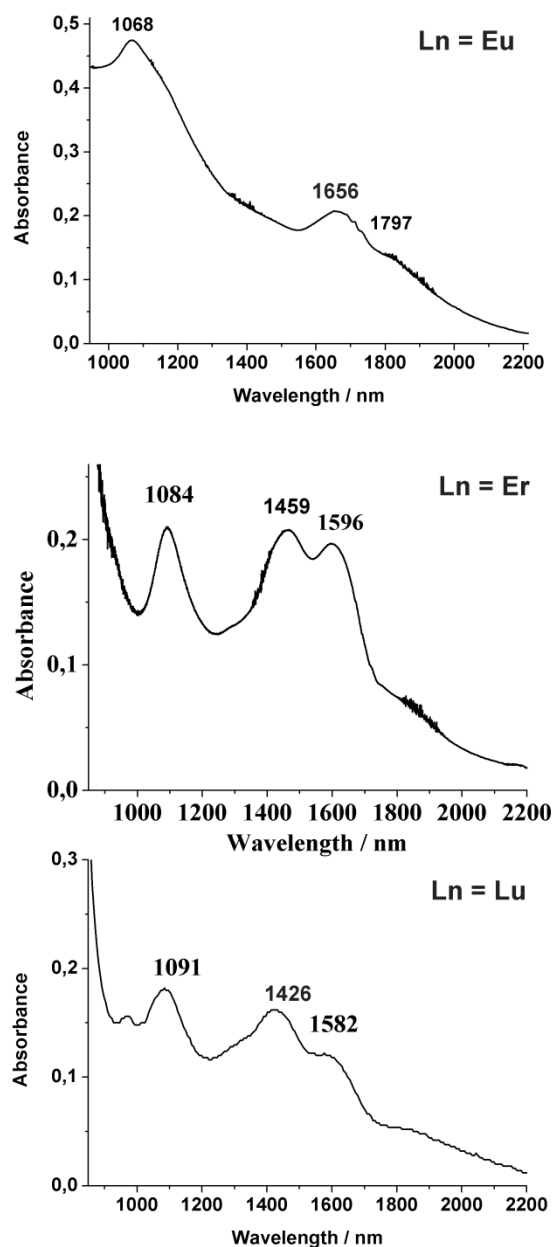

Figure S2. Near-IR spectra of dinaphthalocyanines **11a-c** in  $\text{CCl}_4$ .

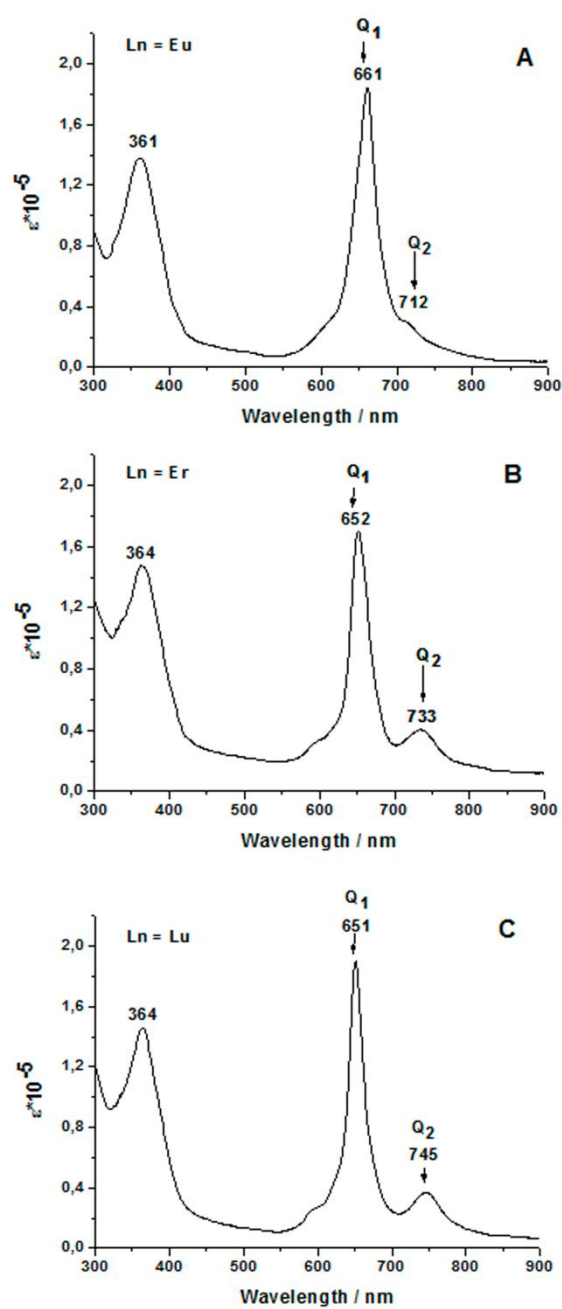

Figure S3. UV/Vis spectra of triple-decker **6a-c** complexes in THF.

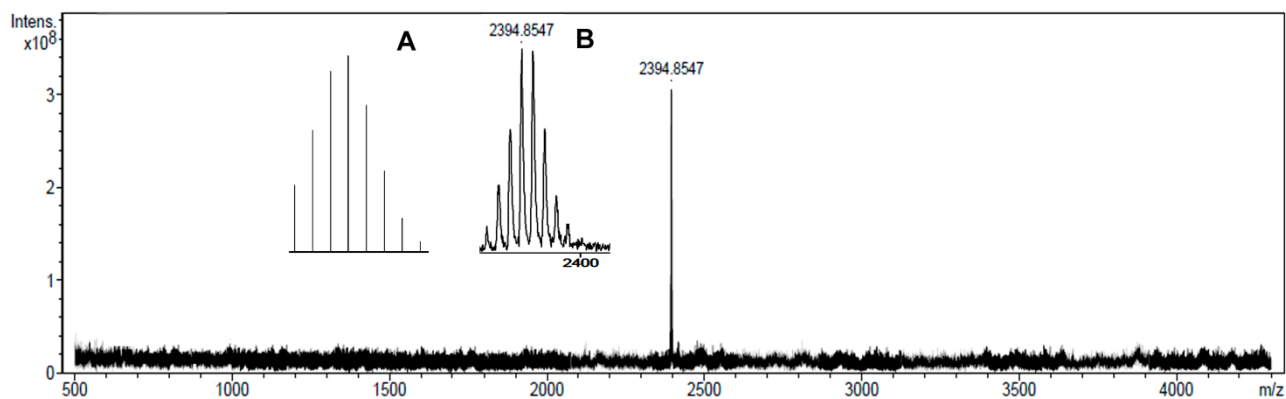

Figure S5. High-resolution MALDI-TOF/TOF mass spectrum of **5a**, isotopic patterns for the molecular ion (inset B) and simulated MS patterns of the molecular ion (inset A).

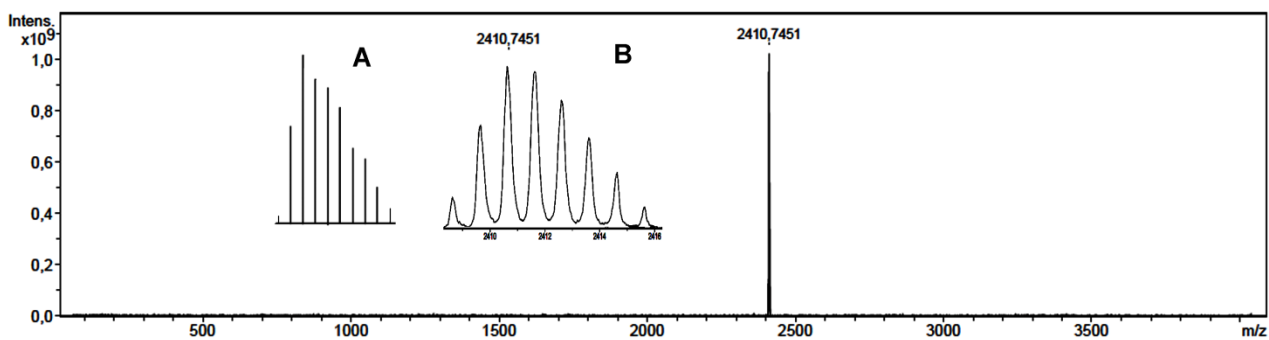

Figure S6. High-resolution MALDI-TOF/TOF mass spectrum of **5b**, isotopic patterns for the molecular ion (inset B) and simulated MS patterns of the molecular ion (inset A).

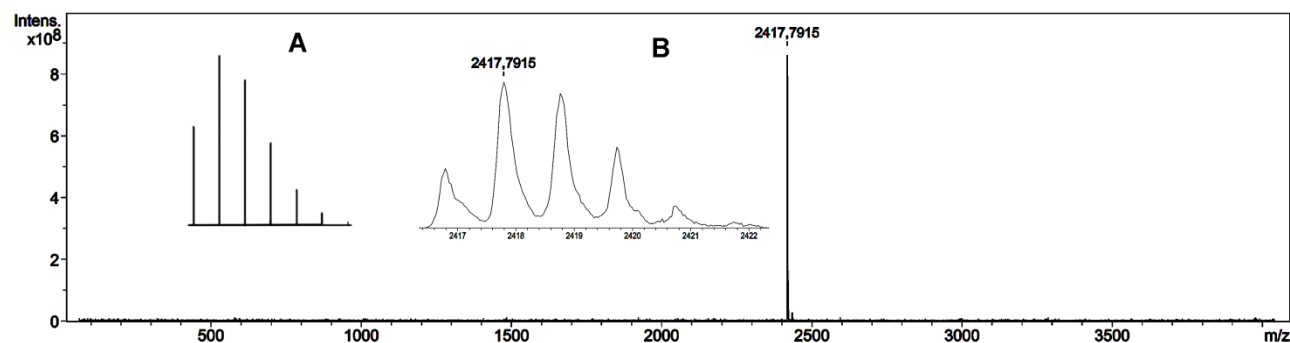

Figure S7. High-resolution MALDI-TOF/TOF mass spectrum of **5c**, isotopic patterns for the molecular ion (inset B) and simulated MS patterns of the molecular ion (inset A).



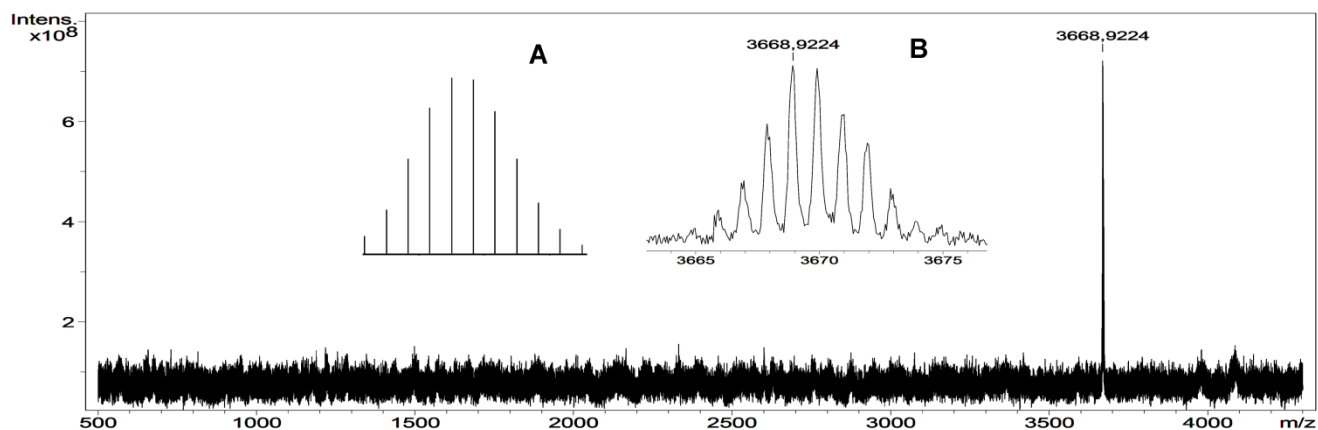

Figure S8. High-resolution MALDI-TOF/TOF mass spectrum of **6a**, isotopic patterns for the molecular ion (inset B) and simulated MS patterns of the molecular ion (inset A).

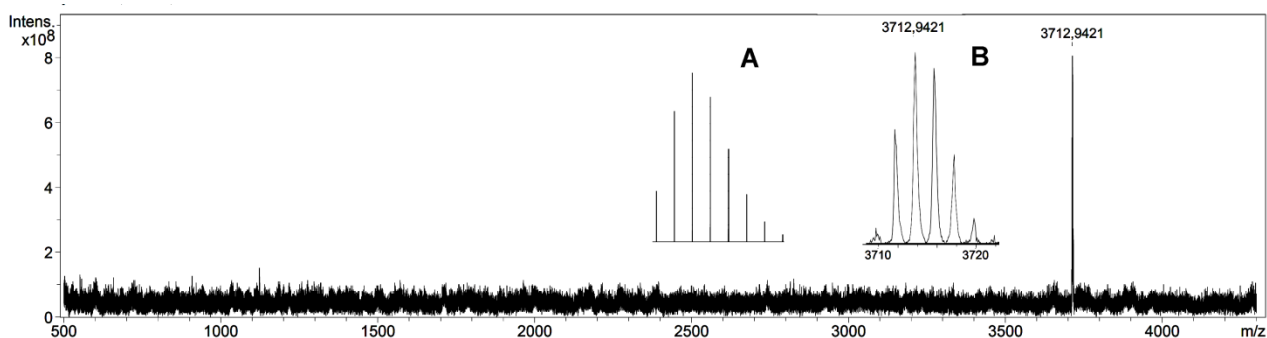

Figure S9. High-resolution MALDI-TOF/TOF mass spectrum of **6c**, isotopic patterns for the molecular ion (inset B) and simulated MS patterns of the molecular ion (inset A).

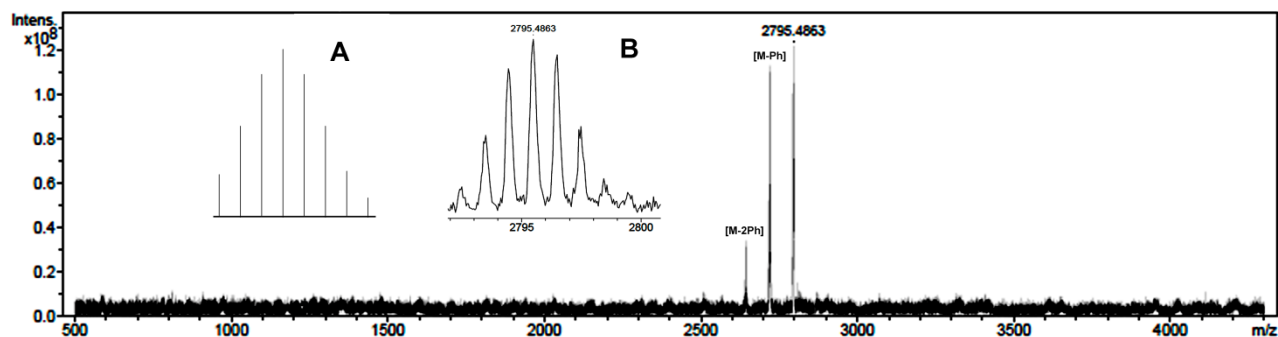

Figure S10. High-resolution MALDI-TOF/TOF mass spectrum of **11a**, isotopic patterns for the molecular ion (inset B) and simulated MS patterns of the molecular ion (inset A).

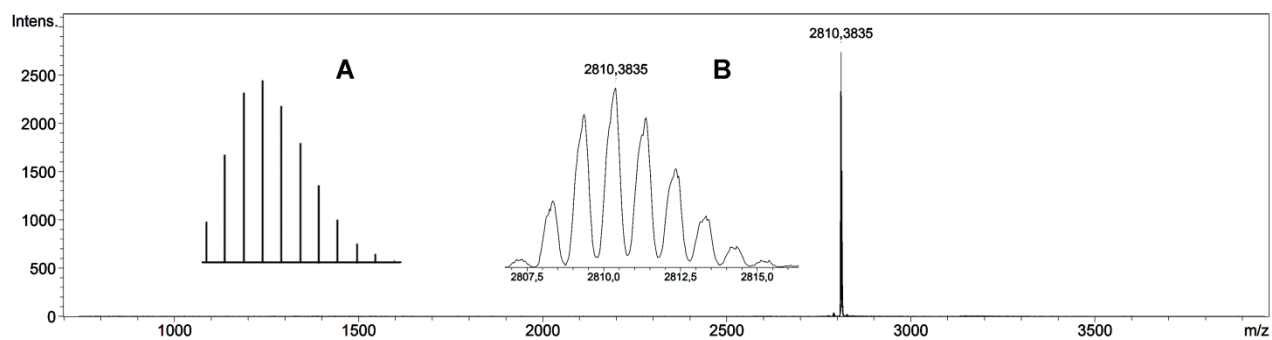

Figure S11. High-resolution MALDI-TOF/TOF mass spectrum of **11b**, isotopic patterns for the molecular ion (inset B) and simulated MS patterns of the molecular ion (inset A).

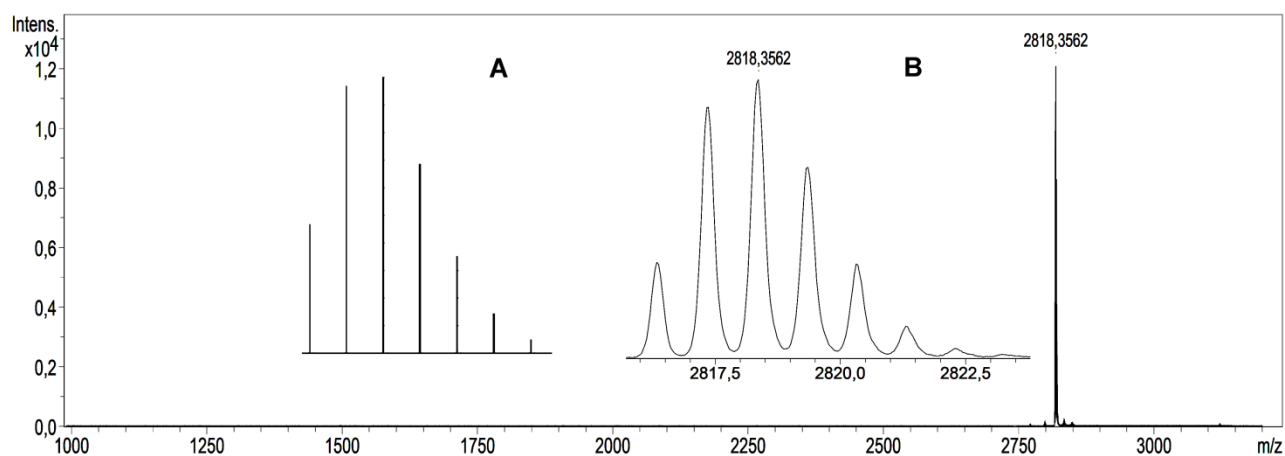

Figure S12. High-resolution MALDI-TOF/TOF mass spectrum of **11c**, isotopic patterns for the molecular ion (inset B) and simulated MS patterns of the molecular ion (inset A).

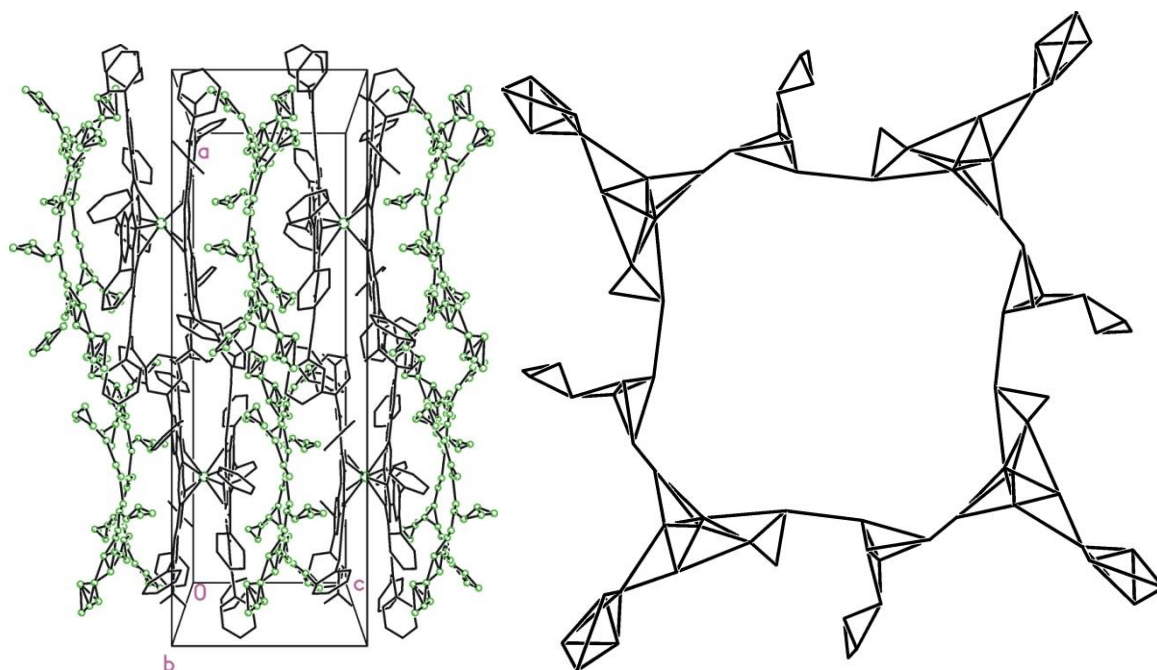

Figure S13. Disposition of residual peaks (before SQUEEZE procedure) in the structure of **5c**: fragment of packing (view along crystallographic axis b, left) and residual peaks view perpendicular to the q4-q30 plane.

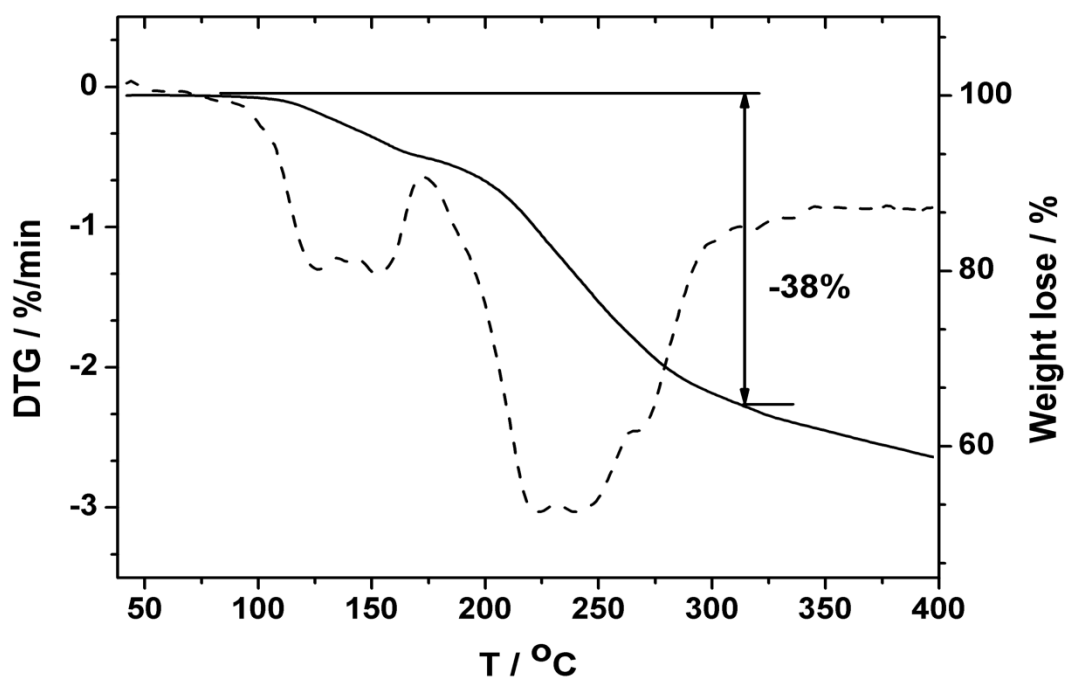

Figure S14. TGA (solid line) and DTG (dashed line) curves for complex **5c**.
